# Supplementary material
Source: ML conference proceedings conference paper supplement (https://openreview.net/forum?id=RQlbMrA5XL)
Supplement: supplementary_material [file attachment]

## APPENDIX

### A. Influencing Factors

We comprehensively show the results of influencing factors in Figure 3 and Figure 4 on Seven-species dataset and HC-PT dataset, respectively. The detailed analysis for these results can be found in the main texts.

### B. Corrected Results for InstaNovo

In the main body of the text, we utilized the original open-source code of InstaNovo for training and testing, only to find that the results were significantly lower than expected. Therefore, after the deadline of the main text, we re-implemented InstaNovo and have since corrected its results. We will also incorporate these new results into the main body of the text in the future.

Table 6: Corrected results for InstaNovo.

| Metric           | Seven-species | Nine-species | HC-PT |
|------------------|---------------|--------------|-------|
| AA. Prec.        | 0.192         | 0.420        | 0.289 |
| AA. Recall       | 0.176         | 0.395        | 0.285 |
| Pep. Prec.       | 0.031         | 0.164        | 0.057 |
| Pep. AUC         | 0.009         | 0.123        | 0.034 |
| PTM Recall       | 0.115         | 0.294        | 0.261 |
| PTM Prec.        | 0.126         | 0.443        | 0.350 |
| Confidence score | 0.665         | 0.782        | 0.652 |
| Training Time    | 0.90          | 0.86         | 0.79  |
| Inference Time   | 0.46          | 0.39         | 0.37  |
| Trainable Params | 92.3          | 92.3         | 92.3  |

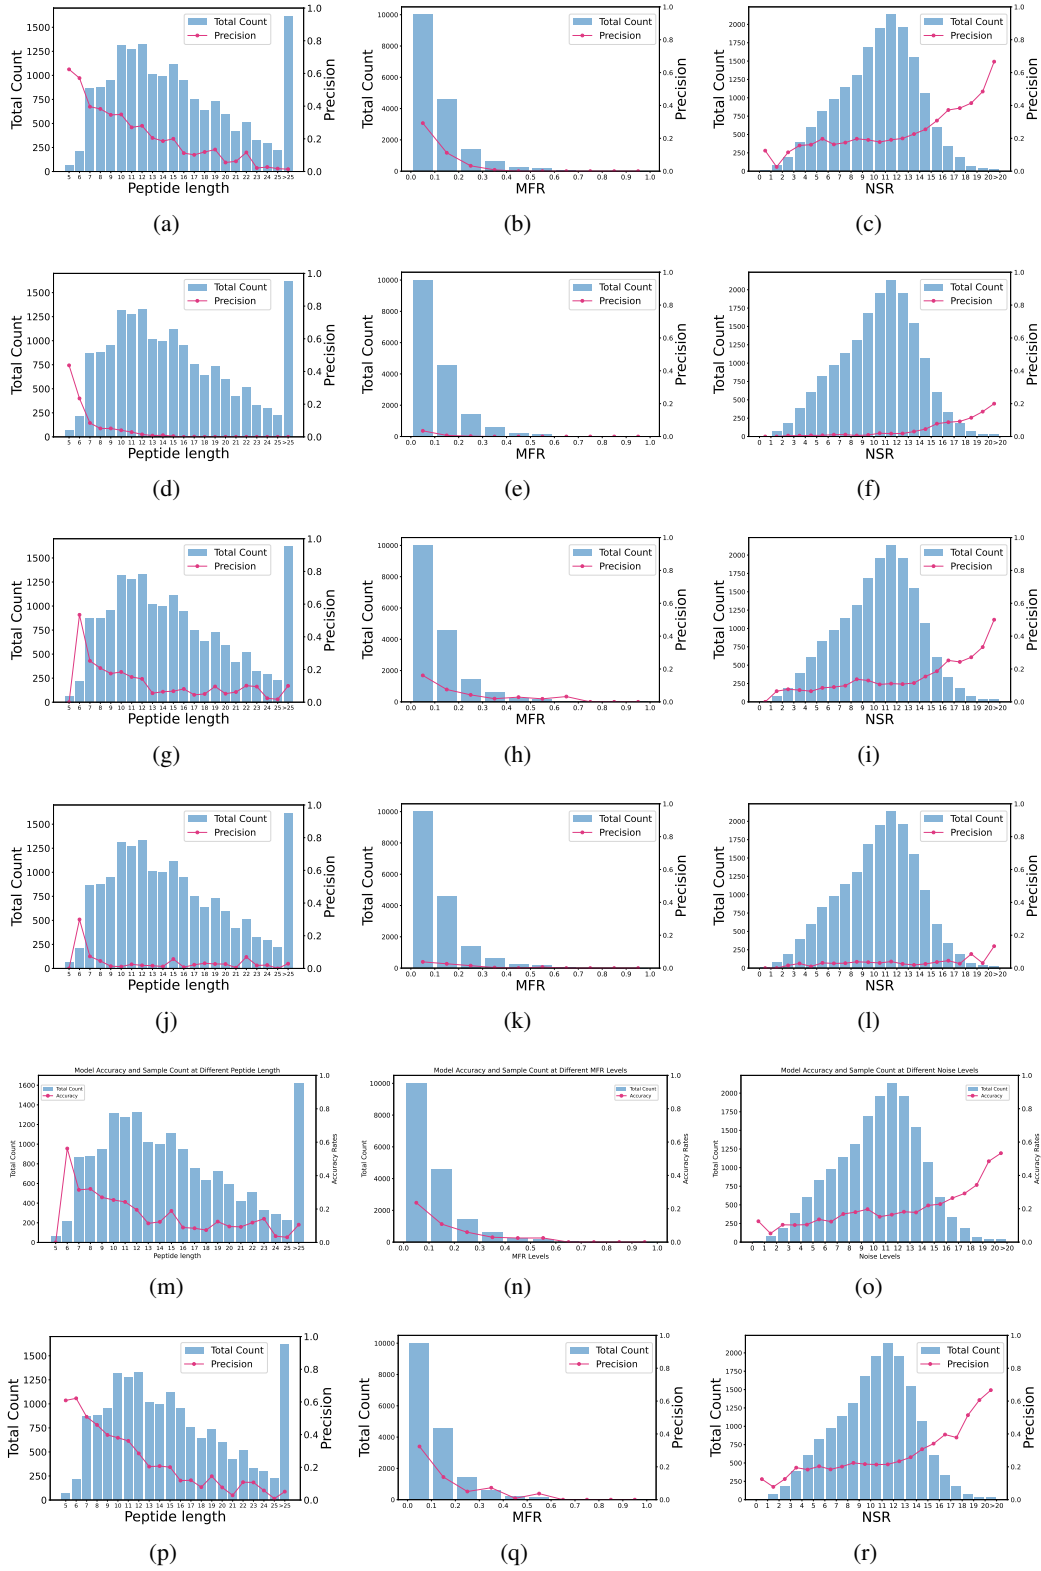

Figure 3: Peptide-level precision curves of the benchmarking models under the influence of three factors on Seven-species dataset. The first row to the sixth row correspond to the models DeepNovo, PointNovo, CasaNovo, InstaNovo, AdaNovo,  $\pi$ -HelixNovo, and the first column to the third column correspond to the three influencing factors Peptide length, missing fragmentation ratio (MFR) and noise peaks (NSR).

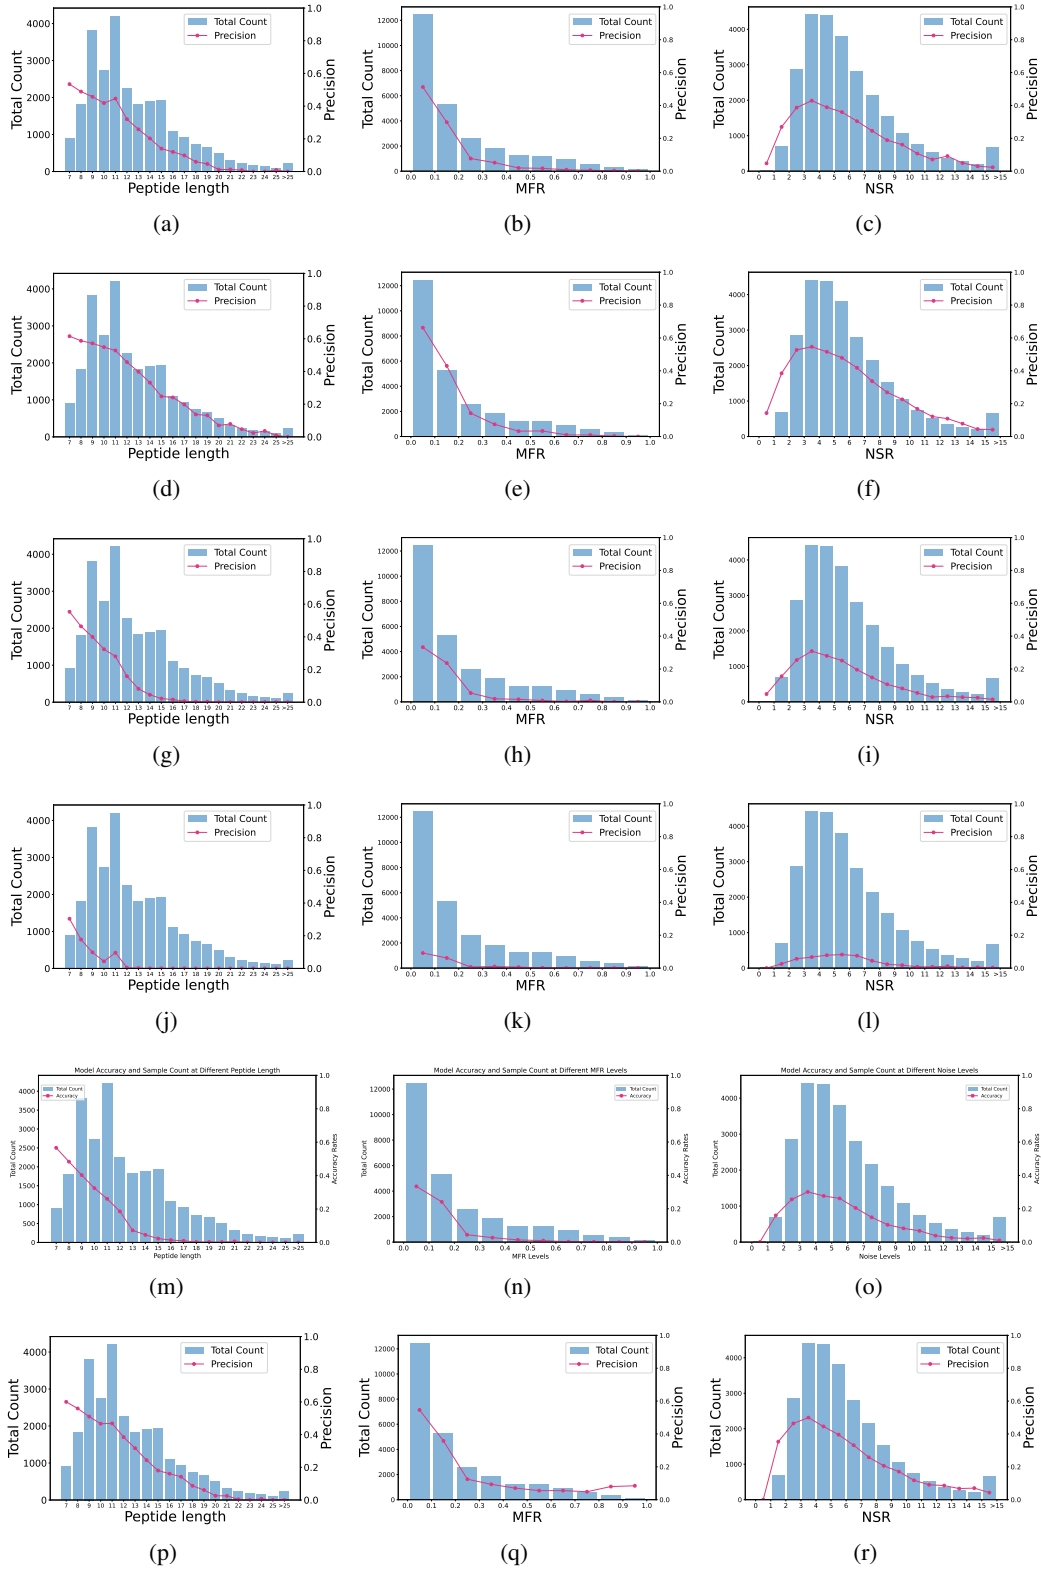

Figure 4: Peptide-level precision curves of the benchmarking models under the influence of three factors on HC-PT dataset. The first row to the sixth row correspond to the models DeepNovo, PointNovo, CasaNovo, InstaNovo, AdaNovo,  $\pi$ -HelixNovo, and the first column to the third column correspond to the three influencing factors Peptide length, missing fragmentation ratio (MFR) and noise peaks (NSR).
